# Supplementary material
Source: ML conference proceedings conference paper supplement (https://proceedings.neurips.cc/paper_files/paper/2018/hash/c0560792e4a3c79e62f76cbf9fb277dd-Abstract.html)
Supplement: Supplementary file [file c0560792e4a3c79e62f76cbf9fb277dd-Supplemental.zip]

---

## Supplementary material: Training deep learning based denoisers without ground truth data

---

Shakarim Soltanayev      Se Young Chun  
Department of Electrical Engineering  
Ulsan National Institute of Science and Technology (UNIST)  
Ulsan, Republic of Korea  
{shakarim,sychun}@unist.ac.kr

Table S1: Results of denoising methods on both BSD68 and Set12 datasets combined (performance in dB). For the DnCNN-BM3D method, the network was trained by optimizing the MSE between BM3D-denoised images and the output images of DnCNN. This method achieved the worst performance among all denoisers.

| Methods       | BM3D  | DnCNN-BM3D | DnCNN-SURE   | DnCNN-SURE-T | DnCNN-MSE-GT |
|---------------|-------|------------|--------------|--------------|--------------|
| $\sigma = 25$ | 28.77 | 28.70      | <b>29.14</b> | <b>29.17</b> | 29.38        |
| $\sigma = 50$ | 25.78 | 25.56      | <b>26.04</b> | <b>26.06</b> | 26.35        |
| $\sigma = 75$ | 24.30 | 24.17      | <b>24.37</b> | <b>24.44</b> | 24.76        |

Table S2: Results of denoising methods at low noise levels on the Set12 dataset (performance in dB).

| Methods       | BM3D         | DnCNN-SURE   | DnCNN-MSE-GT |
|---------------|--------------|--------------|--------------|
| $\sigma = 5$  | 38.03        | <b>38.16</b> | 38.23        |
| $\sigma = 10$ | 34.37        | <b>34.58</b> | 34.72        |
| $\sigma = 15$ | <b>32.36</b> | <b>32.36</b> | 32.78        |

Table S3: Results of denoising methods at low noise levels on the BSD68 dataset (performance in dB).

| Methods       | BM3D  | DnCNN-SURE   | DnCNN-MSE-GT |
|---------------|-------|--------------|--------------|
| $\sigma = 5$  | 37.56 | <b>37.81</b> | 37.87        |
| $\sigma = 10$ | 33.38 | <b>33.72</b> | 33.82        |
| $\sigma = 15$ | 31.07 | <b>31.34</b> | 31.66        |

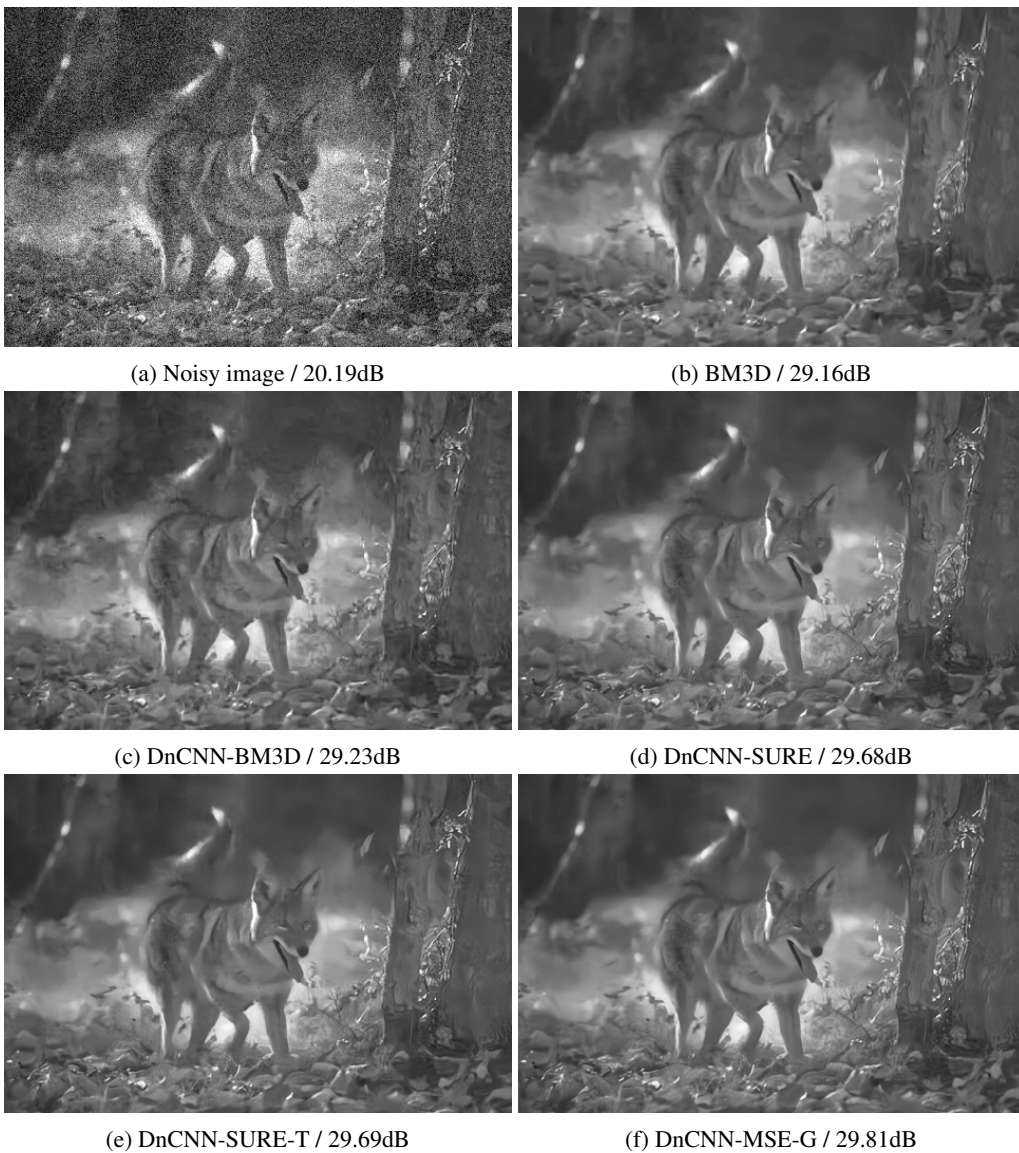

Figure S1: Denoising results of an image from the BSD68 dataset at  $\sigma=25$ . Deep learning based methods yielded sharper images compared to BM3D.

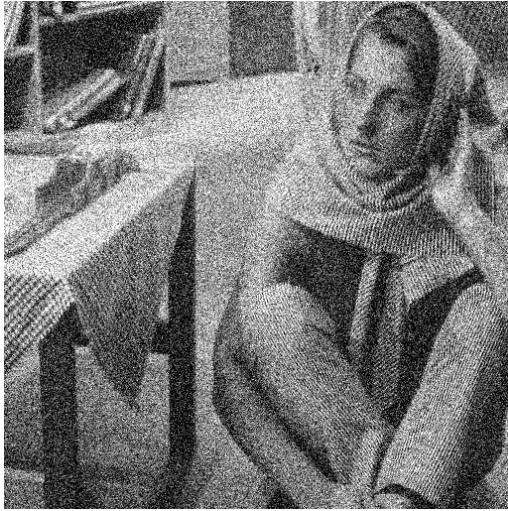

(a) Noisy image / 14.76dB

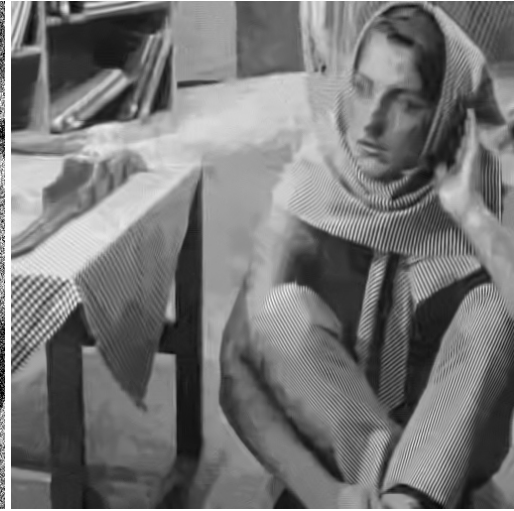

(b) BM3D / 27.19dB

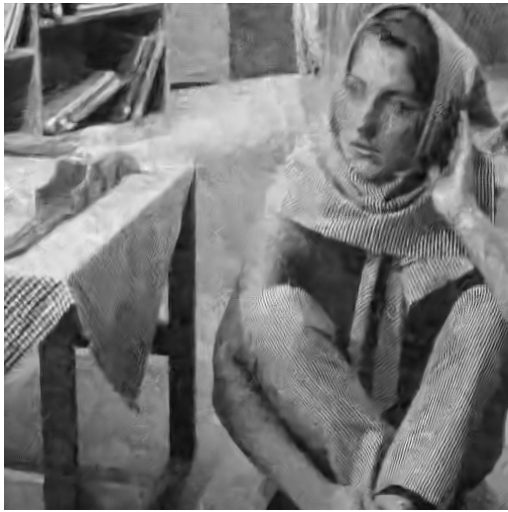

(c) DnCNN-BM3D / 25.30dB

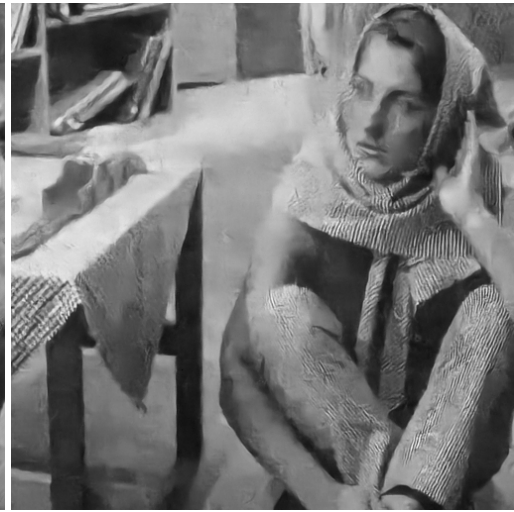

(d) DnCNN-SURE / 24.86dB

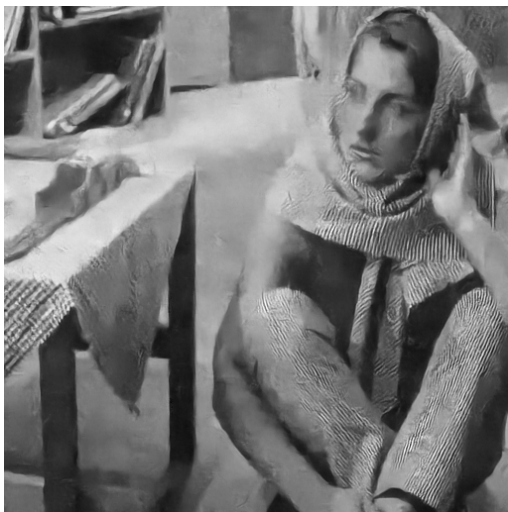

(e) DnCNN-SURE-T / 25.23dB

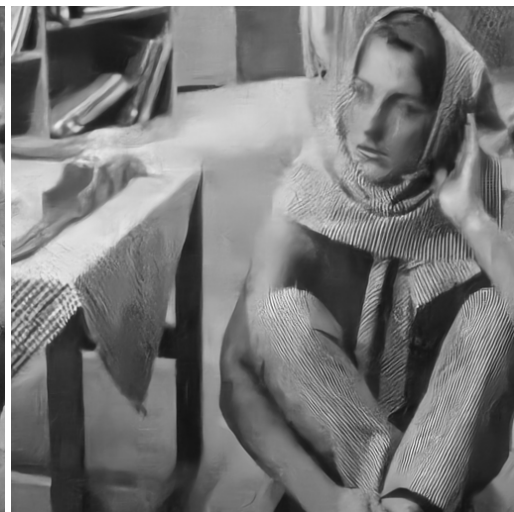

(f) DnCNN-MSE-G / 26.17dB

Figure S2: Denoising results of “Barbara” image at  $\sigma=50$ . BM3D yielded exceptionally good performance on this image owing to many repeated patterns. It even outperformed DnCNN-MSE-G for this special case.

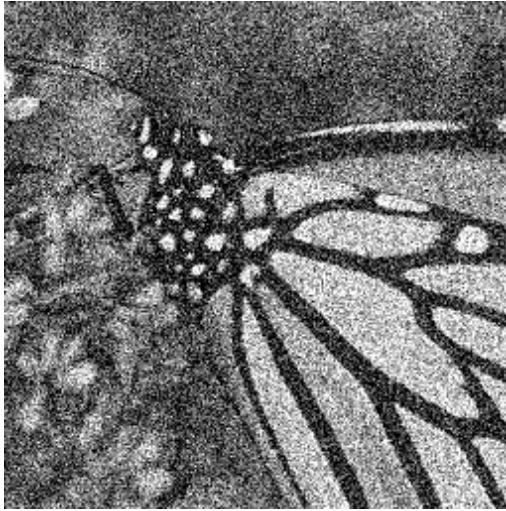

(a) Noisy image / 14.15dB

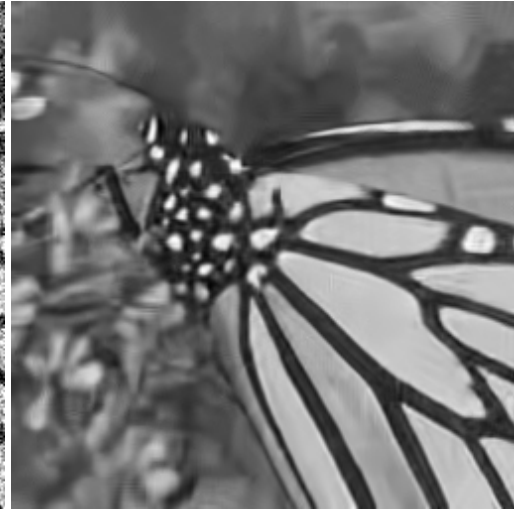

(b) BM3D / 25.78dB

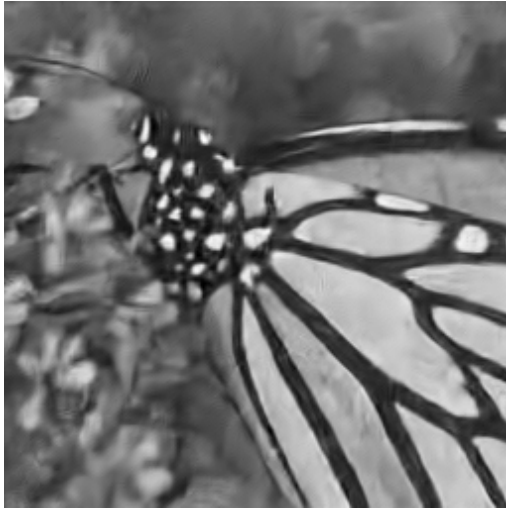

(c) DnCNN-BM3D / 25.66dB

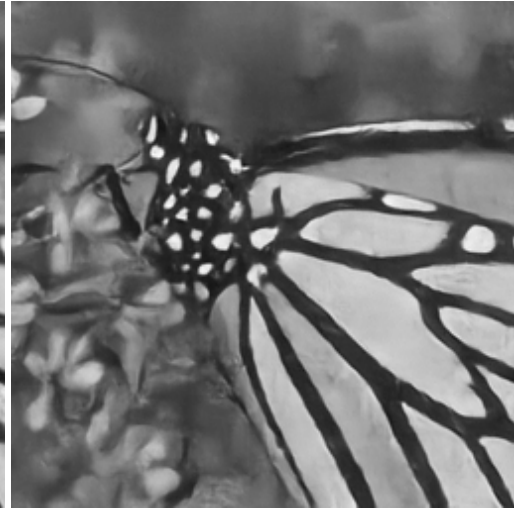

(d) DnCNN-SURE / 26.50dB

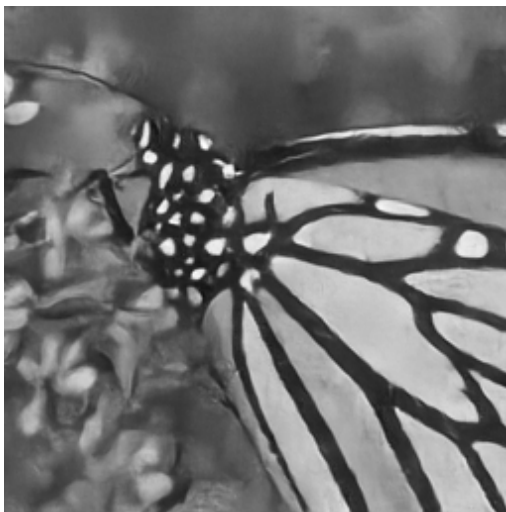

(e) DnCNN-SURE-T / 26.53dB

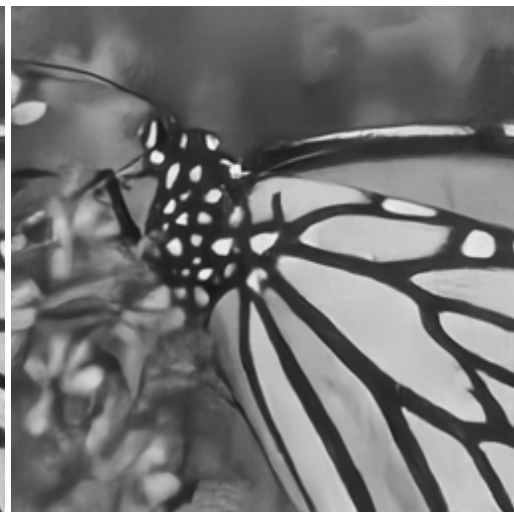

(f) DnCNN-MSE-G / 26.95dB

Figure S3: Denoising results of “Monarch” image at  $\sigma=50$ . Deep learning based methods yielded sharper images compared to the BM3D.

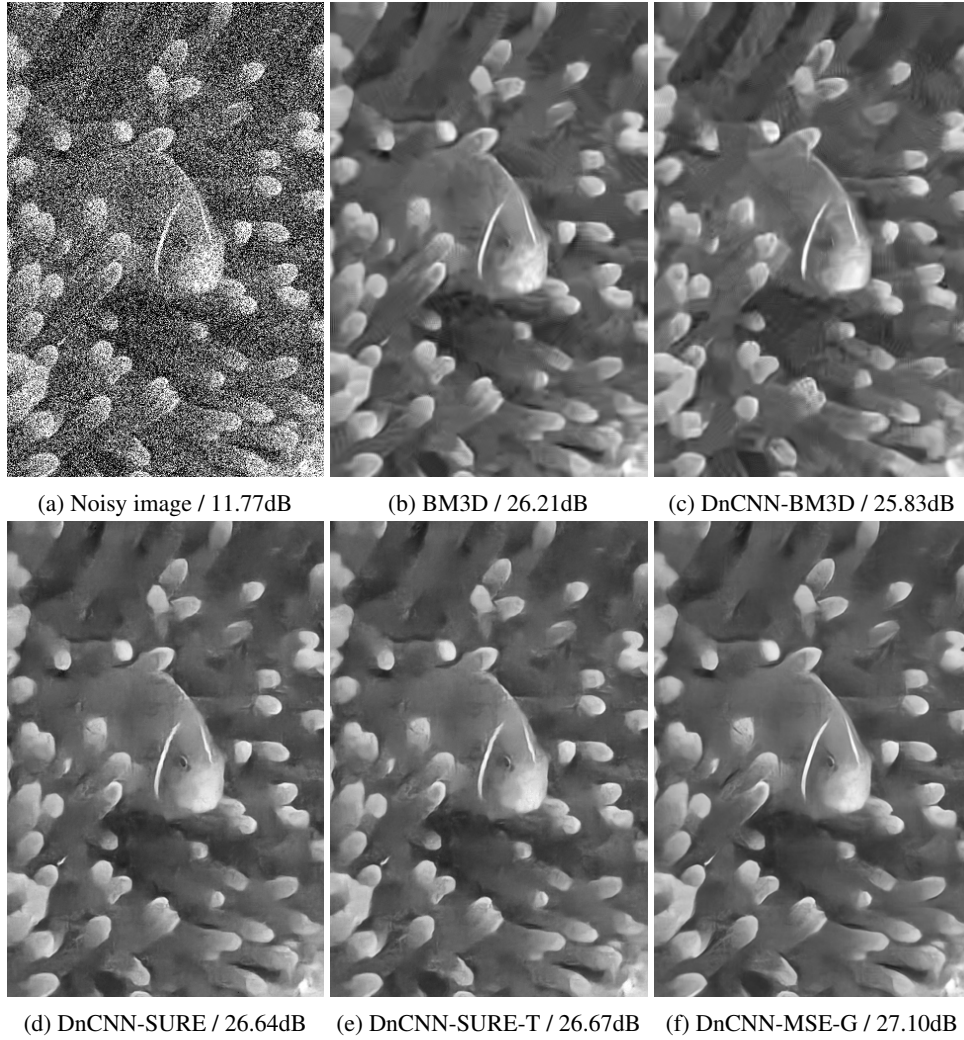

Figure S4: Denoising results of an image from the BSD68 dataset at  $\sigma=75$ . Deep learning based methods yielded sharper images compared to the BM3D.
